# Supplementary material for: Highly hydrophilic microfluidic device prototyping using a novel poly(dimethylsiloxane)-based polymeric mix
Source: Royal Society of Chemistry journal article supplement (doi:10.1039/c4ra14750b), 2014-12-12
Supplement: c4ra14750b1.pdf [file c4ra14750b1.pdf]

**RSC ADVANCES**

**ELECTRONIC SUPPLEMENTARY INFORMATION (ESI)**

**TITLE:**

HIGHLY HYDROPHILIC MICROFLUIDIC DEVICE PROTOTYPING USING A NOVEL  
POLY(DIMETHYLSILOXANE)-BASED POLYMERIC MIX.

**AUTHORS:**

Luis G. Rigat-Brugarolas, Antoni Homs-Corbera and Josep Samitier.

## RSC ADVANCES: ELECTRONIC SUPPLEMENTARY INFORMATION

**Figure S1. Morphological studies using Scanning Electron Microscopy (SEM) imaging.**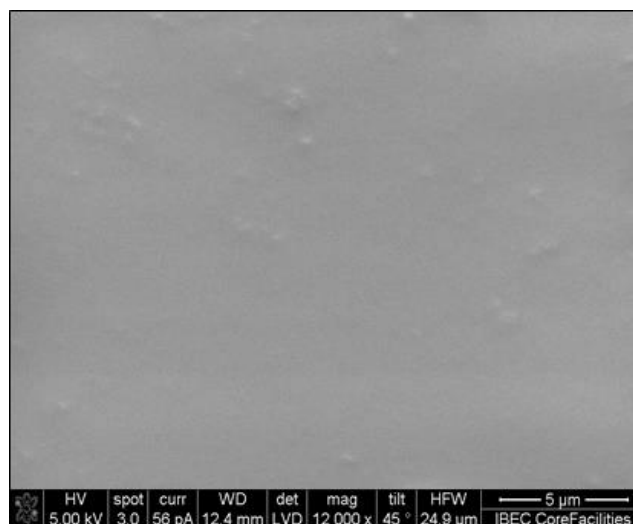

**Figure S1. Morphological studies using Scanning Electron Microscopy (SEM) imaging.** Morphological studies to characterize the mixing were done and homogeneity was confirmed using SEM imaging at a magnification of 12000X using a NOVA NanoSEM 230 high resolution scanning electron microscope (FEI Company).

**Figure S2. Modification of wetting.**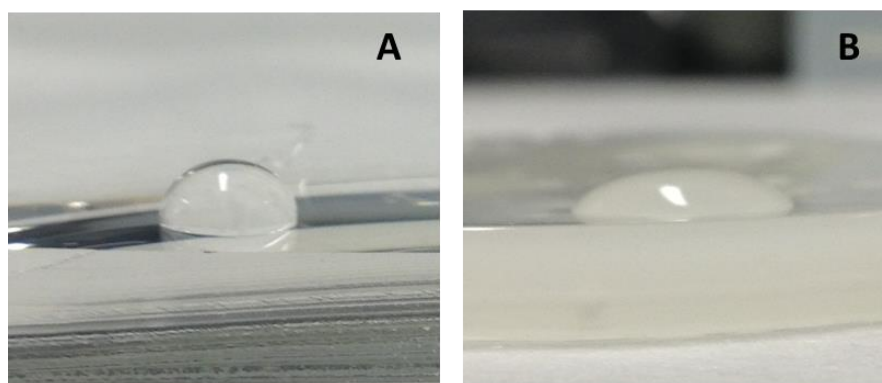

**Figure S2. Modification of wetting.** We demonstrate the ability to efficiently modify the water contact angle of the polymer surface. **Left Panel (A)** shows a water drop over a PDMS sample while the **Right Panel (B)** shows a water drop over the PDMS/HEMA polymer that presents a lower contact angle; therefore, differences in terms of this measure can be observed.

**Supplementary Movie S1. Blood samples flowing through microfluidic devices.**

Movie showing a blood sample flowing through microfluidic devices fabricated either with HEMA/PDMS-IPN or bare PDMS. Differences in blood motion behaviour inside the structures can be observed.
